# Supplementary material for: The Plasmodium falciparum protein PfMRP1 functions as an influx ABC transporter
Source: Research Square preprint supplement (doi:10.21203/rs.3.rs-1210682/v1), 2022-01-13
Supplement: Supplementary file 1 [file b6ecd8bc5b5c0463fc507e04.xlsx]

## Sheet: LandmarkDatabase
Description	Score	E value	Accession
Plasmodium falciparum 3D7[apicomplexans]NextPreviousFirst
multidrug resistance-associated protein 1 [Plasmodium falciparum 3D7]	3637	0	XP_001351050
multidrug resistance-associated protein 2 [Plasmodium falciparum 3D7]	649	0	XP_001350688
Caenorhabditis elegans[nematodes]NextPreviousFirst
Uncharacterized protein CELE_F57C12.5 [Caenorhabditis elegans]	156	1e-36	NP_508122
Uncharacterized protein CELE_F57C12.5 [Caenorhabditis elegans]	155	3e-36	NP_741702
Uncharacterized protein CELE_F57C12.5 [Caenorhabditis elegans]	155	3e-36	NP_001024719
Uncharacterized protein CELE_F57C12.5 [Caenorhabditis elegans]	149	2e-34	NP_001033553
Uncharacterized protein CELE_F20B6.3 [Caenorhabditis elegans]	117	1e-24	NP_001362008
Uncharacterized protein CELE_Y75B8A.26 [Caenorhabditis elegans]	108	4e-22	NP_499598
Uncharacterized protein CELE_F57C12.4 [Caenorhabditis elegans]	106	2e-21	NP_508121
Uncharacterized protein CELE_F21G4.2 [Caenorhabditis elegans]	101	6e-20	NP_509658
Arabidopsis thaliana (thale cress)[eudicots]NextPreviousFirst
multidrug resistance-associated protein 2 [Arabidopsis thaliana]	133	1e-29	NP_001324371
multidrug resistance-associated protein 2 [Arabidopsis thaliana]	132	2e-29	NP_001189675
multidrug resistance-associated protein 2 [Arabidopsis thaliana]	132	2e-29	NP_181013
multidrug resistance-associated protein 1 [Arabidopsis thaliana]	123	2e-26	NP_001031116
multidrug resistance-associated protein 1 [Arabidopsis thaliana]	123	2e-26	NP_174329
multidrug resistance-associated protein 9 [Arabidopsis thaliana]	99	4e-19	NP_001327769
multidrug resistance-associated protein 9 [Arabidopsis thaliana]	98.2	6e-19	NP_191575
multidrug resistance-associated protein 11 [Arabidopsis thaliana]	94.7	7e-18	NP_001323938
multidrug resistance-associated protein 11 [Arabidopsis thaliana]	94.7	8e-18	NP_178811
multidrug resistance-associated protein 11 [Arabidopsis thaliana]	94.7	8e-18	NP_001323936
multidrug resistance-associated protein 11 [Arabidopsis thaliana]	94.4	9e-18	NP_001323937
multidrug resistance-associated protein 11 [Arabidopsis thaliana]	94.4	9e-18	NP_001323940
Dictyostelium discoideum AX4[cellular slime molds]NextPreviousFirst
ABC transporter C family protein [Dictyostelium discoideum AX4]	129	2e-28	XP_641188
ABC transporter C family protein [Dictyostelium discoideum AX4]	127	8e-28	XP_637090
ABC transporter C family protein [Dictyostelium discoideum AX4]	127	1e-27	XP_640932
ABC transporter C family protein [Dictyostelium discoideum AX4]	126	1e-27	XP_637141
ABC transporter C family protein [Dictyostelium discoideum AX4]	124	6e-27	XP_638351
ABC transporter C family protein [Dictyostelium discoideum AX4]	123	1e-26	XP_640934
ABC transporter C family protein [Dictyostelium discoideum AX4]	122	2e-26	XP_641365
ABC transporter C family protein [Dictyostelium discoideum AX4]	120	9e-26	XP_637615
ABC transporter C family protein [Dictyostelium discoideum AX4]	118	4e-25	XP_641045
ABC transporter C family protein [Dictyostelium discoideum AX4]	116	2e-24	XP_635238
ABC transporter C family protein [Dictyostelium discoideum AX4]	112	3e-23	XP_639904
ABC transporter C family protein [Dictyostelium discoideum AX4]	110	1e-22	XP_641050
ABC transporter C family protein [Dictyostelium discoideum AX4]	105	3e-21	XP_637140
Glycine max (soybean)[eudicots]NextPreviousFirst
ABC transporter C family member 2 isoform X1 [Glycine max]	124	6e-27	XP_003546076
ABC transporter C family member 2 isoform X1 [Glycine max]	124	6e-27	XP_006597514
ABC transporter C family member 2 isoform X1 [Glycine max]	124	6e-27	XP_006597515
ABC transporter C family member 2 isoform X1 [Glycine max]	124	6e-27	XP_014623357
ABC transporter C family member 2 [Glycine max]	123	1e-26	XP_003542944
ABC transporter C family member 2 [Glycine max]	123	1e-26	XP_014621250
ABC transporter C family member 2 [Glycine max]	123	1e-26	XP_014621251
ABC transporter C family member 2 [Glycine max]	123	1e-26	XP_014621252
ABC transporter C family member 12 [Glycine max]	114	9e-24	XP_003527527
ABC transporter C family member 2 isoform X1 [Glycine max]	111	2e-23	XP_006578398
ABC transporter C family member 13 isoform X4 [Glycine max]	104	6e-21	XP_006595186
ABC transporter C family member 13 isoform X5 [Glycine max]	104	8e-21	XP_014621633
ABC transporter C family member 13 isoform X2 [Glycine max]	104	8e-21	XP_006595184
ABC transporter C family member 13 isoform X3 [Glycine max]	104	8e-21	XP_006595185
ABC transporter C family member 13 isoform X1 [Glycine max]	104	8e-21	XP_006595183
LOW QUALITY PROTEIN: uncharacterized protein LOC100786761 [Glycine max]	98.2	8e-19	XP_003548999
ABC transporter C family member 10 [Glycine max]	96.3	3e-18	XP_014624584
putative ABC transporter C family member 15 [Glycine max]	94.7	8e-18	XP_003530102
putative ABC transporter C family member 15 [Glycine max]	94.7	8e-18	XP_014633439
putative ABC transporter C family member 15 [Glycine max]	94.7	8e-18	XP_014633440
Saccharomyces cerevisiae S288C[budding yeasts]NextPreviousFirst
bile acid-transporting ATPase YBT1 [Saccharomyces cerevisiae S288C]	124	7e-27	NP_013052
ATP-binding cassette bilirubin transporter BPT1 [Saccharomyces cerevisiae S288C]	121	7e-26	NP_013086
ATP-binding cassette glutathione S-conjugate transporter YCF1 [Saccharomyces cerevisiae S288C]	120	8e-26	NP_010419
ATP-binding cassette transporter YOR1 [Saccharomyces cerevisiae S288C]	110	1e-22	NP_011797
Drosophila melanogaster (fruit fly)[flies]NextPreviousFirst
Multidrug-Resistance like protein 1, isoform M [Drosophila melanogaster]	120	9e-26	NP_995704
Multidrug-Resistance like protein 1, isoform H [Drosophila melanogaster]	120	1e-25	NP_995694
Multidrug-Resistance like protein 1, isoform N [Drosophila melanogaster]	119	2e-25	NP_995703
Multidrug-Resistance like protein 1, isoform E [Drosophila melanogaster]	119	3e-25	NP_995697
Multidrug-Resistance like protein 1, isoform K [Drosophila melanogaster]	115	3e-24	NP_995691
Multidrug-Resistance like protein 1, isoform F [Drosophila melanogaster]	115	4e-24	NP_995696
Multidrug-Resistance like protein 1, isoform I [Drosophila melanogaster]	114	1e-23	NP_995693
Multidrug-Resistance like protein 1, isoform D [Drosophila melanogaster]	114	1e-23	NP_995698
Multidrug-Resistance like protein 1, isoform J [Drosophila melanogaster]	113	1e-23	NP_995692
Multidrug-Resistance like protein 1, isoform A [Drosophila melanogaster]	113	1e-23	NP_723772
Multidrug-Resistance like protein 1, isoform O [Drosophila melanogaster]	113	1e-23	NP_995702
Multidrug-Resistance like protein 1, isoform B [Drosophila melanogaster]	112	4e-23	NP_609591
Multidrug-Resistance like protein 1, isoform C [Drosophila melanogaster]	112	4e-23	NP_995699
Multidrug-Resistance like protein 1, isoform Q [Drosophila melanogaster]	103	1e-20	NP_995700
Multidrug-Resistance like protein 1, isoform P [Drosophila melanogaster]	103	2e-20	NP_995701
Multidrug-Resistance like protein 1, isoform G [Drosophila melanogaster]	102	3e-20	NP_995695
Multidrug-Resistance like protein 1, isoform L [Drosophila melanogaster]	102	4e-20	NP_995690
Multidrug-Resistance like protein 1, isoform R [Drosophila melanogaster]	100	2e-19	NP_001303319
Danio rerio (zebrafish)[bony fishes]NextPreviousFirst
canalicular multispecific organic anion transporter 2 isoform X3 [Danio rerio]	117	1e-24	XP_009304647
multidrug resistance-associated protein 9 [Danio rerio]	116	2e-24	XP_009301629
multidrug resistance-associated protein 5 [Danio rerio]	113	2e-23	XP_009289330
multidrug resistance-associated protein 5 [Danio rerio]	113	2e-23	XP_017214608
multidrug resistance-associated protein 5 [Danio rerio]	113	2e-23	XP_021328455
multidrug resistance-associated protein 5 [Danio rerio]	113	2e-23	XP_021328456
multidrug resistance-associated protein 5 [Danio rerio]	113	2e-23	XP_021329979
canalicular multispecific organic anion transporter 2 isoform X2 [Danio rerio]	111	5e-23	XP_009304646
canalicular multispecific organic anion transporter 2 isoform X1 [Danio rerio]	111	5e-23	XP_009304645
multidrug resistance-associated protein 1 [Danio rerio]	110	1e-22	XP_001341895
ATP-binding cassette sub-family C member 9 isoform X6 [Danio rerio]	97.1	2e-18	XP_005164763
ATP-binding cassette sub-family C member 9 isoform X7 [Danio rerio]	97.1	2e-18	XP_005164764
ATP-binding cassette sub-family C member 9 [Danio rerio]	96.7	2e-18	NP_001025325
Homo sapiens (human)[primates]NextPreviousFirst
canalicular multispecific organic anion transporter 1 isoform X1 [Homo sapiens]	113	1e-23	XP_006717693
canalicular multispecific organic anion transporter 1 [Homo sapiens]	111	5e-23	NP_000383
canalicular multispecific organic anion transporter 1 isoform X2 [Homo sapiens]	100	1e-19	XP_011537593
canalicular multispecific organic anion transporter 1 isoform X4 [Homo sapiens]	99.8	1e-19	XP_016871164
canalicular multispecific organic anion transporter 1 isoform X3 [Homo sapiens]	99.8	2e-19	XP_006717694
multidrug resistance-associated protein 4 isoform 4 [Homo sapiens]	97.8	5e-19	NP_001288759
ATP-binding cassette sub-family C member 12 isoform 1 [Homo sapiens]	98.6	5e-19	NP_150229
multidrug resistance-associated protein 4 isoform X4 [Homo sapiens]	97.8	6e-19	XP_016875811
multidrug resistance-associated protein 4 isoform X2 [Homo sapiens]	97.8	6e-19	XP_016875809
multidrug resistance-associated protein 4 isoform X1 [Homo sapiens]	98.2	7e-19	XP_005254082
multidrug resistance-associated protein 4 isoform X1 [Homo sapiens]	98.2	7e-19	XP_016875808
multidrug resistance-associated protein 4 isoform 3 [Homo sapiens]	97.8	7e-19	NP_001288758
multidrug resistance-associated protein 4 isoform 2 [Homo sapiens]	97.4	7e-19	NP_001098985
multidrug resistance-associated protein 4 isoform 1 [Homo sapiens]	97.8	8e-19	NP_005836
Schizosaccharomyces pombe (fission yeast)[ascomycetes]NextPreviousFirst
multi drug resistance-associated protein abc3 [Schizosaccharomyces pombe]	106	2e-21	NP_595055
ABC transporter Ybt1 [Schizosaccharomyces pombe]	99.8	2e-19	NP_594585
Mus musculus (house mouse)[rodents]NextPreviousFirst
canalicular multispecific organic anion transporter 1 isoform X1 [Mus musculus]	104	6e-21	XP_006526688
canalicular multispecific organic anion transporter 1 [Mus musculus]	104	9e-21	NP_038834
multidrug resistance-associated protein 9 isoform X3 [Mus musculus]	101	6e-20	XP_006531049
multidrug resistance-associated protein 9 isoform X2 [Mus musculus]	101	6e-20	XP_006531048
ATP-binding cassette sub-family C member 12 [Mus musculus]	100	9e-20	NP_766500
multidrug resistance-associated protein 9 isoform X1 [Mus musculus]	100	9e-20	XP_006531047
multidrug resistance-associated protein 4 isoform 3 [Mus musculus]	95.9	4e-18	NP_001157148
multidrug resistance-associated protein 4 isoform X1 [Mus musculus]	95.1	4e-18	XP_006519073
multidrug resistance-associated protein 4 isoform 2 [Mus musculus]	95.5	4e-18	NP_001157147
multidrug resistance-associated protein 4 isoform 1 [Mus musculus]	95.5	4e-18	NP_001028508
Leishmania donovani[kinetoplastids]NextPreviousFirst
p-glycoprotein e, partial [Leishmania donovani]	98.6	6e-19	XP_003863220
