# Supplementary material for: The Plasmodium falciparum protein PfMRP1 functions as an influx ABC transporter
Source: Research Square preprint supplement (doi:10.21203/rs.3.rs-1210682/v1), 2022-01-13
Supplement: Supplementary file 3 [file d92ce781faf07fde88ce118d.xlsx]

## Sheet: (a) Dd2
Direction	Id	FDR	logCPM	logFC	Desc
UP	PF3D7_0424000	1.87568e-10	4.14953	4.06467	Plasmodium exported protein (PHISTc), unknown function
UP	PF3D7_0401700	1.67733e-06	3.19491	1.84515	Plasmodium exported protein, unknown function, pseudogene
UP	PF3D7_0523200	0.00679414	3.73145	1.1001	conserved Plasmodium protein, unknown function
DOWN	PF3D7_0112800	7.73615e-29	2.99571	-5.6885	Plasmodium exported protein (hyp11), unknown function
DOWN	PF3D7_0112200	8.44084e-11	8.04969	-1.62523	multidrug resistance-associated protein 1
DOWN	PF3D7_0632800	3.32958e-07	6.15451	-1.81457	erythrocyte membrane protein 1, PfEMP1
DOWN	PF3D7_1035500	2.35402e-06	6.26876	-1.2886	merozoite surface protein 6
DOWN	PF3D7_0822900	0.000147475	5.4447	-1.13973	conserved Plasmodium protein, unknown function
DOWN	PF3D7_0525800	0.000147475	6.07885	-1.10769	inner membrane complex protein 1g, putative
DOWN	PF3D7_1126700	0.000197301	5.89987	-1.10212	autophagy-related protein 23, putative
DOWN	PF3D7_1007300	0.000616001	4.18767	-1.15228	RING zinc finger protein, putative
DOWN	PF3D7_0414900	0.000640818	5.68183	-1.04353	armadillo-domain containing rhoptry protein
DOWN	PF3D7_1356800	0.000829196	6.35598	-1.0134	serine/threonine protein kinase, putative
DOWN	PF3D7_0919200	0.00088352	2.45728	-1.487	PPPDE peptidase, putative
DOWN	PF3D7_1468400	0.00112728	4.58898	-1.07099	zinc finger protein, putative
DOWN	PF3D7_1335300	0.00178779	4.86971	-1.04075	reticulocyte binding protein 2 homologue b
DOWN	PF3D7_0708900	0.00178837	5.04185	-1.03773	protein SCO1, putative
DOWN	PF3D7_0404000	0.00229139	3.30987	-1.15494	conserved Plasmodium protein, unknown function
DOWN	PF3D7_1366100	0.00846351	3.70331	-1.01196	DIP13 homolog, putative
Genes up or down in Dd2_KO relative to Dd2_WT with FDR <= 0.01 and fold change > 2

## Sheet: (b) 3D7
Direction	Id	FDR	logCPM	logFC	Desc
UP	PF3D7_0214300	5.28619e-33	5.87408	3.10003	conserved Plasmodium protein, unknown function
UP	PF3D7_0532600	1.78849e-27	3.92569	3.16627	Plasmodium exported protein, unknown function
UP	PF3D7_0315600	8.74404e-27	5.26824	2.80723	zinc finger protein, putative
UP	PF3D7_0422300	8.98737e-23	7.26514	2.33789	alpha tubulin 2
UP	PF3D7_1134600	2.72136e-19	5.33003	2.31022	zinc finger protein, putative
UP	PF3D7_0605600	2.32506e-17	2.82352	3.08161	nucleoside diphosphate kinase, putative
UP	PF3D7_0725300	5.2873e-17	5.41536	2.0744	conserved Plasmodium protein, unknown function
UP	PF3D7_1403700	1.36358e-16	4.29797	2.30606	translocation associated membrane protein, putative
UP	PF3D7_0632500	6.83837e-15	3.65819	2.22882	erythrocyte membrane protein 1, PfEMP1
UP	PF3D7_1125400	1.26933e-14	6.04395	1.86849	mitochondrial import inner membrane translocase subunit TIM44, putative
UP	PF3D7_0831400	2.51589e-14	7.12793	1.78538	Plasmodium exported protein, unknown function
UP	PF3D7_0819500	3.59399e-14	5.11418	1.91911	conserved protein, unknown function
UP	PF3D7_1039000	5.58805e-14	5.91221	1.83975	serine/threonine protein kinase, FIKK family
UP	PF3D7_0621200	8.61507e-14	7.33328	1.74939	pyridoxine biosynthesis protein PDX1
UP	PF3D7_1474200	1.23428e-13	3.09245	2.56631	conserved Plasmodium membrane protein, unknown function
UP	PF3D7_1232900	1.39414e-13	3.99934	2.07788	nucleotidyltransferase, putative
UP	PF3D7_1215300	1.71016e-13	5.8392	1.79158	10 kDa chaperonin
UP	PF3D7_1351600	1.71016e-13	3.80388	2.29066	glycerol kinase
UP	PF3D7_1477500	2.55744e-13	5.79389	1.78183	Plasmodium exported protein (PHISTb), unknown function
UP	PF3D7_1102700	4.7494e-13	4.3361	2.0613	early transcribed membrane protein 11.1
UP	PF3D7_1027000	7.52964e-13	3.99229	2.02926	conserved Plasmodium protein, unknown function
UP	PF3D7_1134000	1.17262e-12	9.50965	1.63551	heat shock protein 70
UP	PF3D7_1357900	2.31439e-12	6.59851	1.66341	pyrroline-5-carboxylate reductase, putative
UP	PF3D7_1327300	2.33086e-12	6.56727	1.68886	conserved Plasmodium protein, unknown function
UP	PF3D7_1353700	2.33086e-12	4.00038	1.91631	reactive oxygen species modulator 1, putative
UP	PF3D7_1337100	4.88353e-12	4.99363	1.74423	protein kinase 6
UP	PF3D7_0830600	5.96394e-12	4.31849	1.929	Plasmodium exported protein (PHISTc), unknown function
UP	PF3D7_1432500	8.40722e-12	5.22329	1.70817	RNA methyltransferase, putative
UP	PF3D7_0813300	1.21929e-11	8.35834	1.56248	conserved Plasmodium protein, unknown function
UP	PF3D7_0602100	1.61532e-11	6.31779	1.60907	ATP-dependent RNA helicase, putative
UP	PF3D7_0723600	1.72501e-11	4.85801	1.71513	proteasome assembly chaperone 4, putative
UP	PF3D7_1224600	3.61318e-11	4.61782	1.73743	cytochrome c heme lyase, putative
UP	PF3D7_0727200	6.19651e-11	5.56208	1.61375	cysteine desulfurase, putative
UP	PF3D7_0903600.1	6.73339e-11	5.04304	1.6887
UP	PF3D7_0730900	8.76444e-11	6.55544	1.5249	EMP1-trafficking protein
UP	PF3D7_0424600	8.97118e-11	6.36647	1.54655	Plasmodium exported protein (PHISTb), unknown function
UP	PF3D7_1360500	1.00633e-10	5.05072	1.62697	guanylyl cyclase beta
UP	PF3D7_0516000	1.00633e-10	5.16492	1.61853	RAP protein, putative
UP	PF3D7_1148700	1.02527e-10	4.81797	1.71112	Plasmodium exported protein (PHISTc), unknown function
UP	PF3D7_0729400	1.04419e-10	5.46837	1.57515	ribosome biogenesis protein BRX1, putative
UP	PF3D7_1412600	1.25131e-10	4.41054	1.70714	deoxyhypusine synthase
UP	PF3D7_0925500	1.27763e-10	4.97949	1.64082	thioredoxin-like protein 2
UP	PF3D7_0301300	1.30651e-10	3.19356	1.98348	epoxide hydrolase 1
UP	PF3D7_1410200	1.44855e-10	6.614	1.51469	cytidine triphosphate synthetase
UP	PF3D7_1102500	1.66309e-10	5.83582	1.58847	Plasmodium exported protein (PHISTb), unknown function
UP	PF3D7_0923200	1.72494e-10	6.01509	1.52268	nitric oxide synthase, putative
UP	PF3D7_1012600	1.78082e-10	6.67711	1.49777	GMP synthase [glutamine-hydrolyzing]
UP	PF3D7_1006700	1.81318e-10	4.78084	1.63914	conserved Plasmodium protein, unknown function
UP	PF3D7_1404800	2.21845e-10	4.54033	1.6744	conserved Plasmodium protein, unknown function
UP	PF3D7_0104500	3.50414e-10	5.75274	1.51334	conserved protein, unknown function
UP	PF3D7_1246100	4.85997e-10	3.94406	1.77811	delta-aminolevulinic acid synthetase
UP	PF3D7_0314700	4.85997e-10	5.53702	1.54332	RING finger protein RNF1
UP	PF3D7_1126600	4.8844e-10	4.83844	1.58456	steryl ester hydrolase, putative
UP	PF3D7_1236200	5.42399e-10	6.76079	1.46825	conserved Plasmodium protein, unknown function
UP	PF3D7_1015900	6.09576e-10	12.0655	1.40633	enolase
UP	PF3D7_0205100	6.61225e-10	4.99808	1.54798	conserved Plasmodium protein, unknown function
UP	PF3D7_1038400	6.61467e-10	3.15512	1.92435	gametocyte-specific protein
UP	PF3D7_0936200	7.53677e-10	5.18105	1.53438	Plasmodium exported protein (hyp11), unknown function
UP	PF3D7_1036700	8.84887e-10	4.00129	1.69022	phosducin-like protein, putative
UP	PF3D7_1325800	8.84887e-10	3.72439	1.70454	conserved Plasmodium protein, unknown function
UP	PF3D7_0214000	1.05148e-09	7.52217	1.41027	T-complex protein 1 subunit theta
UP	PF3D7_1453600	1.29672e-09	4.04654	1.64442	RAP protein, putative
UP	PF3D7_1355600	1.41201e-09	3.23037	1.87553	PhIL1 interacting protein PIP1
UP	PF3D7_1371900	1.49416e-09	3.5911	1.77578	Plasmodium exported protein, unknown function
UP	PF3D7_0920800	1.69666e-09	6.54686	1.41944	inosine-5'-monophosphate dehydrogenase
UP	PF3D7_1026200	2.02146e-09	5.2025	1.48457	conserved Plasmodium protein, unknown function
UP	PF3D7_0824100	2.51694e-09	3.91494	1.63587	exonuclease, putative
UP	PF3D7_0512700	2.60623e-09	5.42881	1.45929	orotate phosphoribosyltransferase
UP	PF3D7_1226000	4.0857e-09	3.39788	1.80526	conserved Plasmodium protein, unknown function
UP	PF3D7_1209400	4.73969e-09	5.37862	1.44431	cytosolic iron-sulfur protein assembly protein 1, putative
UP	PF3D7_0406200	4.81704e-09	8.9798	1.34481	sexual stage-specific protein precursor
UP	PF3D7_0214400	5.09346e-09	5.67302	1.41915	conserved Plasmodium protein, unknown function
UP	PF3D7_0211400	5.15263e-09	3.08777	1.95881	beta-ketoacyl-ACP synthase III
UP	PF3D7_0919700	5.15434e-09	4.06711	1.56918	pyridoxal 5'-phosphate dependent enzyme class III, putative
UP	PF3D7_0927200	5.41452e-09	3.27719	1.96576	zinc finger protein, putative
UP	PF3D7_1230200	5.53071e-09	6.33821	1.37873	vacuolar transporter chaperone, putative, pseudogene
UP	PF3D7_0826000	6.33757e-09	4.39458	1.58933	conserved Plasmodium protein, unknown function
UP	PF3D7_1302000	7.36375e-09	4.98331	1.46758	EMP1-trafficking protein
UP	PF3D7_1115300	7.36375e-09	4.46712	1.48681	cysteine proteinase falcipain 2b
UP	PF3D7_0113000	7.56234e-09	10.3182	1.31702	glutamic acid-rich protein
UP	PF3D7_1143800	7.70895e-09	5.36141	1.4058	oocyst capsule protein Cap93, putative
UP	PF3D7_0603600	7.82533e-09	4.33906	1.55054	conserved Plasmodium protein, unknown function
UP	PF3D7_1015300	7.82533e-09	6.03582	1.37794	methionine aminopeptidase 1b, putative
UP	PF3D7_0505000	7.844e-09	4.57998	1.51505	conserved Plasmodium membrane protein, unknown function
UP	PF3D7_1237200	8.10199e-09	5.96626	1.37525	conserved Plasmodium protein, unknown function
UP	PF3D7_0408600	8.27165e-09	4.76073	1.51668	sporozoite invasion-associated protein 1
UP	PF3D7_0213700	1.03024e-08	5.15124	1.41145	conserved protein, unknown function
UP	PF3D7_1371800	1.03655e-08	5.90133	1.36906	Plasmodium exported protein, unknown function
UP	PF3D7_1227800	1.12179e-08	5.99186	1.37307	elongator complex protein 3, putative
UP	PF3D7_0206300	1.14181e-08	7.63309	1.31834	pentafunctional AROM polypeptide, putative, pseudogene
UP	PF3D7_1473600	1.18113e-08	3.746	1.55772	conserved Plasmodium protein, unknown function
UP	PF3D7_1118200	1.3096e-08	7.4907	1.31279	heat shock protein 90, putative
UP	PF3D7_1014700	1.49902e-08	6.02528	1.3527	prohibitin, putative
UP	PF3D7_0716100	1.52415e-08	6.09014	1.34662	protein SDA1, putative
UP	PF3D7_1213700	1.58516e-08	5.10618	1.41192	DNA-directed RNA polymerases I, II, and III subunit RPABC3, putative
UP	PF3D7_1367400	1.7304e-08	4.52629	1.45884	conserved Plasmodium protein, unknown function
UP	PF3D7_1474000	1.88699e-08	5.17748	1.62641	probable protein, unknown function
UP	PF3D7_0621300	1.9229e-08	4.53221	1.45709	mRNA-binding protein PUF3
UP	PF3D7_1134700	2.0789e-08	6.08722	1.33589	DNA-directed RNA polymerase I subunit RPA2, putative
UP	PF3D7_1434800	2.64392e-08	7.90454	1.28084	mitochondrial acidic protein MAM33, putative
UP	PF3D7_1367600	3.13423e-08	4.70528	1.41138	ribosome biogenesis protein MRT4, putative
UP	PF3D7_1201000	3.40273e-08	9.67895	1.25899	Plasmodium exported protein (PHISTb), unknown function
UP	PF3D7_1467600	3.6343e-08	7.57513	1.30693	conserved Plasmodium protein, unknown function
UP	PF3D7_1146000	3.7198e-08	5.51134	1.34635	ribosome assembly protein 4, putative
UP	PF3D7_0410600	3.79886e-08	6.31678	1.31441	conserved Plasmodium protein, unknown function
UP	PF3D7_0524900	3.80976e-08	5.87509	1.31871	S-adenosyl-L-methionine-dependent tRNA 4-demethylwyosine synthase, putative
UP	PF3D7_1027100	4.03021e-08	5.96244	1.31529	U3 small nucleolar ribonucleoprotein protein MPP10, putative
UP	PF3D7_0818900	4.6516e-08	13.6387	1.24298	heat shock protein 70
UP	PF3D7_1221400	5.145e-08	3.21441	1.9044	inner membrane complex protein 1h, putative
UP	PF3D7_0409400	5.26065e-08	6.36178	1.28833	chaperone protein DnaJ
UP	PF3D7_0106400	5.28683e-08	4.60684	1.40003	pre-rRNA-processing protein TSR2, putative
UP	PF3D7_1457700	6.00677e-08	5.53286	1.31816	large ribosomal subunit nuclear export factor, putative
UP	PF3D7_1014000	6.62042e-08	2.86202	1.82872	GDP-L-fucose synthase
UP	PF3D7_1430100	6.62042e-08	5.49575	1.34586	serine/threonine protein phosphatase 2A activator
UP	PF3D7_1446400	6.70643e-08	4.50668	1.41382	pyruvate dehydrogenase E1 component subunit beta
UP	PF3D7_1208600	7.2936e-08	4.92962	1.35462	mitochondrial import inner membrane translocase subunit TIM10, putative
UP	PF3D7_1133100	7.2936e-08	6.06845	1.2911	conserved Plasmodium protein, unknown function
UP	PF3D7_0813800	7.2936e-08	3.92855	1.64866	GDP-mannose 4,6-dehydratase
UP	PF3D7_0717400	7.78594e-08	6.30015	1.28742	queuine tRNA-ribosyltransferase, putative
UP	PF3D7_1334200	7.85957e-08	6.27838	1.272	chaperone binding protein, putative
UP	PF3D7_1356200	8.46128e-08	5.00699	1.34921	mitochondrial import inner membrane translocase subunit TIM23, putative
UP	PF3D7_1354300	9.3478e-08	7.51558	1.23512	large subunit rRNA methyltransferase, putative
UP	PF3D7_1001400	9.49672e-08	3.7701	1.55937	exported lipase 1
UP	PF3D7_1008800	9.98059e-08	7.35633	1.23468	nucleolar protein 5, putative
UP	PF3D7_0504700	1.00833e-07	6.24463	1.25445	centrosomal protein CEP120, putative
UP	PF3D7_0830700	1.1717e-07	5.30554	1.30668	Plasmodium exported protein (hyp9), unknown function
UP	PF3D7_0411400	1.28839e-07	4.90809	1.33381	DEAD box ATP-dependent RNA helicase, putative
UP	PF3D7_0319700	1.33718e-07	5.61984	1.29101	ABC transporter I family member 1, putative
UP	PF3D7_1301500	1.42684e-07	3.39672	1.56532	Plasmodium exported protein (PHISTa), unknown function
UP	PF3D7_1302100	1.4493e-07	7.71132	1.42827	gamete antigen 27/25
UP	PF3D7_1332700	1.49292e-07	5.93666	1.25883	ATP-dependent RNA helicase DBP8, putative
UP	PF3D7_0518700	1.5336e-07	4.11495	1.41117	mRNA-binding protein PUF1
UP	PF3D7_0617000	1.61351e-07	5.39977	1.28388	mitochondrial import receptor subunit TOM40, putative
UP	PF3D7_0906700	1.73827e-07	3.95309	1.43656	leucine-rich repeat protein
UP	PF3D7_1324000	1.86377e-07	4.15543	1.42567	conserved Plasmodium protein, unknown function
UP	PF3D7_0311600	1.90258e-07	4.35945	1.35191	dolichyl-diphosphooligosaccharide--protein glycosyltransferase subunit 1, putative
UP	PF3D7_1251500	1.92893e-07	5.80224	1.25996	ATP-dependent RNA helicase DRS1, putative
UP	PF3D7_1358500	1.94893e-07	4.41051	1.36139	zinc finger protein, putative
UP	PF3D7_1333600	1.95577e-07	5.26988	1.28148	U3 small nucleolar RNA-associated protein 4, putative
UP	PF3D7_0628000	1.98788e-07	4.31559	1.42248	6-pyruvoyltetrahydropterin synthase
UP	PF3D7_0729300	2.04353e-07	5.58479	1.2616	60S ribosomal export protein NMD3, putative
UP	PF3D7_1106600	2.04353e-07	5.19629	1.28906	DEAD/DEAH box helicase, putative
UP	PF3D7_1202300	2.37998e-07	4.26639	1.41075	dynein heavy chain, putative
UP	PF3D7_1364900	2.37998e-07	3.95639	1.42767	ferrochelatase
UP	PF3D7_0936400	2.55811e-07	2.52488	2.02448	ring-exported protein 4
UP	PF3D7_0818400	2.59652e-07	5.41604	1.2678	rRNA-processing protein FCF1, putative
UP	PF3D7_1349400	2.62088e-07	4.63733	1.33909	cytidine and deoxycytidylate deaminase, putative
UP	PF3D7_0312500	2.6242e-07	4.39827	1.38251	major facilitator superfamily-related transporter, putative
UP	PF3D7_1006100	2.63616e-07	3.70355	1.53217	CCR4-NOT transcription complex subunit 5, putative
UP	PF3D7_1434300	2.9659e-07	9.04474	1.17261	Hsp70/Hsp90 organizing protein
UP	PF3D7_1434600	2.9659e-07	6.56874	1.20196	methionine aminopeptidase 2
UP	PF3D7_1122900	2.9671e-07	3.32714	1.48061	dynein heavy chain, putative
UP	PF3D7_1332800	3.09368e-07	6.38845	1.21142	eukaryotic translation initiation factor 6, putative
UP	PF3D7_1434500	3.1015e-07	7.02189	1.18869	dynein-related AAA-type ATPase, putative
UP	PF3D7_1442000	3.29685e-07	3.67312	1.41315	ADP-ribosylation factor, putative
UP	PF3D7_0109400	3.67337e-07	5.68617	1.26582	tubulin-specific chaperone a, putative
UP	PF3D7_1228900	3.69439e-07	7.052	1.18163	conserved Plasmodium protein, unknown function
UP	PF3D7_1443500	3.74845e-07	4.8088	1.2797	poly(A)-specific ribonuclease PARN, putative
UP	PF3D7_0726100	3.74845e-07	4.49101	1.32723	Plasmodium exported protein, unknown function
UP	PF3D7_1431100	3.79253e-07	2.95528	1.94655	PhIL1 interacting protein PIP2
UP	PF3D7_1228200	3.90206e-07	3.08027	1.59067	conserved Plasmodium protein, unknown function
UP	PF3D7_0936600	3.91673e-07	3.91929	1.78967	gametocyte exported protein 5
UP	PF3D7_0830800	3.91673e-07	3.59768	1.5619	surface-associated interspersed protein 8.2 (SURFIN 8.2)
UP	PF3D7_1215100	3.94186e-07	4.91063	1.27733	conserved Plasmodium protein, unknown function
UP	PF3D7_1226500	3.95078e-07	5.2756	1.2571	RAP protein, putative
UP	PF3D7_1436300	4.36861e-07	6.86771	1.19486	translocon component PTEX150
UP	PF3D7_0915300	4.36861e-07	3.70611	1.41083	conserved Plasmodium protein, unknown function
UP	PF3D7_0816000	4.426e-07	5.52281	1.25828	ribosome assembly protein RRB1, putative
UP	PF3D7_0829200	4.49198e-07	5.91197	1.21041	prohibitin, putative
UP	PF3D7_1436000	4.56501e-07	7.46722	1.16575	glucose-6-phosphate isomerase
UP	PF3D7_1336800	4.71096e-07	6.32985	1.1921	nuclear movement protein, putative
UP	PF3D7_1031900	5.16672e-07	3.82188	1.40366	conserved Plasmodium protein, unknown function
UP	PF3D7_0730300	5.65653e-07	8.98831	1.14312	AP2 domain transcription factor AP2-L, putative
UP	PF3D7_0502600	5.73072e-07	4.69764	1.28286	conserved Plasmodium protein, unknown function
UP	PF3D7_1368600	6.03049e-07	4.36967	1.30099	mitochondrial import inner membrane translocase subunit TIM9, putative
UP	PF3D7_1448000	6.05308e-07	5.32549	1.2244	U3 small nucleolar RNA-associated protein 12, putative
UP	PF3D7_1353100	6.17566e-07	5.31463	1.25715	Plasmodium exported protein, unknown function
UP	PF3D7_0830900	6.21915e-07	4.56934	1.31173	Plasmodium exported protein, unknown function
UP	PF3D7_1425600	6.39053e-07	2.56925	1.82067	zinc finger protein, putative
UP	PF3D7_1415200	6.78377e-07	3.11067	1.5863	DNA-directed RNA polymerases I and III subunit RPAC2, putative
UP	PF3D7_1302700	7.09314e-07	6.11684	1.18378	ATP-dependent RNA helicase DHR1, putative
UP	PF3D7_1340300	7.71983e-07	6.36107	1.17339	nucleolar complex protein 2, putative
UP	PF3D7_1405800	7.71983e-07	6.9232	1.15548	ribosome biogenesis protein BOP1, putative
UP	PF3D7_1411500	7.79469e-07	4.82782	1.24321	conserved Plasmodium protein, unknown function
UP	PF3D7_0202500	7.98096e-07	5.10309	1.28767	early transcribed membrane protein 2
UP	PF3D7_0308200	8.01352e-07	8.03106	1.1349	T-complex protein 1 subunit eta
UP	PF3D7_0509400	8.14544e-07	7.0931	1.14849	RNA polymerase I
UP	PF3D7_1461800	8.67278e-07	3.87873	1.66066	conserved Plasmodium protein, unknown function
UP	PF3D7_1145900	8.87292e-07	3.35522	1.66964	conserved Plasmodium protein, unknown function
UP	PF3D7_1344100	8.91373e-07	4.77598	1.2715	TLD domain-containing protein, putative
UP	PF3D7_1364800	8.93717e-07	6.21258	1.16773	DNA-directed RNA polymerases I, II, and III subunit RPABC1, putative
UP	PF3D7_0802300	9.00877e-07	5.93487	1.17432	periodic tryptophan protein 2, putative
UP	PF3D7_0410000	9.14489e-07	5.48177	1.29685	erythrocyte vesicle protein 1
UP	PF3D7_1445400	9.26971e-07	7.47077	1.13677	protein serine/threonine kinase-1
UP	PF3D7_0307900	9.51582e-07	5.90439	1.17104	conserved Plasmodium protein, unknown function
UP	PF3D7_0519000	9.90943e-07	3.38945	1.4639	histone RNA hairpin-binding protein, putative
UP	PF3D7_0609200	1.03171e-06	4.53373	1.39674	citrate synthase-like protein, putative
UP	PF3D7_1202700	1.03377e-06	4.38278	1.29352	conserved Plasmodium protein, unknown function
UP	PF3D7_0301600	1.03836e-06	5.6497	1.18364	Plasmodium exported protein (hyp1), unknown function
UP	PF3D7_0603300	1.0412e-06	6.37898	1.15527	dihydroorotate dehydrogenase
UP	PF3D7_0810800	1.0487e-06	6.45976	1.14799	hydroxymethyldihydropterin pyrophosphokinase-dihydropteroate synthase
UP	PF3D7_1010200	1.12338e-06	6.25837	1.15423	DNA2/NAM7 helicase, putative
UP	PF3D7_0921200	1.1316e-06	4.97146	1.22431	conserved Plasmodium membrane protein, unknown function
UP	PF3D7_1129400	1.18269e-06	6.66116	1.14032	rRNA (cytosine-C(5))-methyltransferase, putative
UP	PF3D7_0213900	1.20338e-06	5.2551	1.19661	conserved Plasmodium protein, unknown function
UP	PF3D7_1333500	1.20838e-06	4.39736	1.26233	conserved Plasmodium protein, unknown function
UP	PF3D7_1212300	1.20885e-06	5.69789	1.17224	WD repeat-containing protein, putative
UP	PF3D7_0418700	1.24345e-06	5.47403	1.19362	RNA-binding protein NOB1, putative
UP	PF3D7_0216000	1.30177e-06	5.39322	1.21279	DEAD/DEAH box helicase, putative
UP	PF3D7_1301400	1.34499e-06	5.02956	1.23628	Plasmodium exported protein (hyp12), unknown function
UP	PF3D7_0501000	1.35371e-06	7.8813	1.11013	Plasmodium exported protein, unknown function
UP	PF3D7_0208200	1.46772e-06	6.01203	1.15397	KRR1 small subunit processome component, putative
UP	PF3D7_0710500	1.59522e-06	4.90167	1.2205	conserved Plasmodium protein, unknown function
UP	PF3D7_1123900	1.63612e-06	6.88948	1.11889	13 kDa ribonucleoprotein-associated protein, putative
UP	PF3D7_1020800	1.63612e-06	4.3238	1.34493	dihydrolipoamide acyltransferase component E2
UP	PF3D7_0401700	1.71219e-06	3.19491	1.74862	Plasmodium exported protein, unknown function, pseudogene
UP	PF3D7_1413200	1.72085e-06	3.89992	1.33386	conserved Plasmodium protein, unknown function
UP	PF3D7_1415800	1.80892e-06	5.00961	1.19479	dimethyladenosine transferase, putative
UP	PF3D7_1115700	1.84931e-06	7.57872	1.10178	cysteine proteinase falcipain 2a
UP	PF3D7_1206600	1.94737e-06	6.91374	1.1113	DNA-directed RNA polymerase III subunit RPC2, putative
UP	PF3D7_1431800	1.94887e-06	3.97795	1.29247	apyrase, putative
UP	PF3D7_1409500	2.01606e-06	3.58958	1.46005	conserved Plasmodium protein, unknown function
UP	PF3D7_0900100	2.05771e-06	4.83187	1.20899	erythrocyte membrane protein 1, PfEMP1
UP	PF3D7_1357800	2.09985e-06	8.45994	1.08836	T-complex protein 1 subunit delta
UP	PF3D7_1302900	2.11403e-06	3.61205	1.34852	conserved Plasmodium protein, unknown function
UP	PF3D7_0318600	2.19703e-06	4.79353	1.21192	cleavage and polyadenylation specificity factor, putative
UP	PF3D7_1201400	2.36798e-06	3.46494	1.43717	Plasmodium exported protein, unknown function
UP	PF3D7_0726200	2.41382e-06	4.31972	1.21759	serine/threonine protein kinase, FIKK family
UP	PF3D7_1412500	2.5412e-06	5.52104	1.14625	actin II
UP	PF3D7_1421400	2.55622e-06	4.7201	1.19842	DNA-directed RNA polymerase III subunit RPC6, putative
UP	PF3D7_1237100	2.56453e-06	6.60899	1.09939	conserved Plasmodium protein, unknown function
UP	PF3D7_1230600	2.6053e-06	5.77641	1.13508	sun-family protein, putative
UP	PF3D7_0621800	2.69069e-06	8.90896	1.07476	nascent polypeptide-associated complex subunit alpha, putative
UP	PF3D7_1006600	2.69611e-06	5.71056	1.13454	phosducin-like protein, putative
UP	PF3D7_0217700	2.71092e-06	4.90527	1.18503	E2F-associated phosphoprotein, putative
UP	PF3D7_0607800	2.83345e-06	5.09809	1.1773	GTP-binding protein, putative
UP	PF3D7_1361000	2.86338e-06	3.69807	1.38201	protein arginine N-methyltransferase 5, putative
UP	PF3D7_0602200	2.95534e-06	5.64028	1.1311	MYND-type zinc finger protein, putative
UP	PF3D7_1116800	2.98784e-06	6.56624	1.09977	heat shock protein 101
UP	PF3D7_1033400	3.06607e-06	8.37083	1.07127	haloacid dehalogenase-like hydrolase
UP	PF3D7_1147500	3.18619e-06	3.28234	1.37717	protein farnesyltransferase subunit beta
UP	PF3D7_1418900	3.1993e-06	5.89557	1.11855	ATP-dependent RNA helicase DBP4, putative
UP	PF3D7_1473700	3.21693e-06	5.29626	1.30565	nucleoporin NUP116/NSP116, putative
UP	PF3D7_1225000	3.26785e-06	3.17129	1.40286	conserved Plasmodium protein, unknown function
UP	PF3D7_1133700	3.27687e-06	6.90845	1.09548	FHA domain-containing protein, putative
UP	PF3D7_1435800	3.30805e-06	3.41692	1.40074	GTPase Era, putative
UP	PF3D7_0717900	3.32982e-06	4.79841	1.17973	thioredoxin-like protein
UP	PF3D7_0902000	3.33881e-06	4.76855	1.17261	serine/threonine protein kinase, FIKK family
UP	PF3D7_0925900	3.70814e-06	8.64231	1.05973	conserved Plasmodium protein, unknown function
UP	PF3D7_0502700	3.71215e-06	3.20289	1.43926	conserved Plasmodium protein, unknown function
UP	PF3D7_0913400	3.71215e-06	4.04836	1.28688	conserved Plasmodium protein, unknown function
UP	PF3D7_1015600	3.71215e-06	8.3011	1.06382	heat shock protein 60
UP	PF3D7_1476200	3.86489e-06	5.87981	1.11333	Plasmodium exported protein (PHISTb), unknown function
UP	PF3D7_0203700	3.97809e-06	6.3136	1.09334	protein MAK16, putative
UP	PF3D7_0629600	4.20906e-06	3.17103	1.4085	RNA-binding protein, putative
UP	PF3D7_1221500	4.35888e-06	4.517	1.18143	conserved Plasmodium protein, unknown function
UP	PF3D7_1411900	4.36887e-06	4.62776	1.17203	p1/s1 nuclease, putative
UP	PF3D7_1407100	4.4165e-06	7.14429	1.06693	rRNA 2'-O-methyltransferase fibrillarin, putative
UP	PF3D7_1329400	4.46752e-06	5.9077	1.11037	AMP deaminase, putative
UP	PF3D7_0823100	4.61301e-06	5.01501	1.15153	RWD domain-containing protein, putative
UP	PF3D7_0107200	4.61301e-06	4.69256	1.17792	carbon catabolite repressor protein 4, putative
UP	PF3D7_0203100	4.91873e-06	4.14768	1.30981	protein kinase, putative
UP	PF3D7_0704200	4.93954e-06	4.59549	1.17285	tRNA m5C-methyltransferase, putative
UP	PF3D7_1201500	5.00253e-06	5.27971	1.128	XPA binding protein 1, putative
UP	PF3D7_0907100	5.12185e-06	5.80059	1.10417	conserved Plasmodium protein, unknown function
UP	PF3D7_1363000	5.21269e-06	2.66804	1.5044	conserved Plasmodium protein, unknown function
UP	PF3D7_1405500	5.33822e-06	3.07502	1.42033	COBW domain-containing protein 1, putative
UP	PF3D7_1362200	5.34575e-06	5.98737	1.09465	RuvB-like helicase 3
UP	PF3D7_0817100	5.50373e-06	3.59815	1.27631	tRNA modification GTPase, putative
UP	PF3D7_1357700	5.74033e-06	5.16735	1.12605	U3 small nucleolar RNA-associated protein 21, putative
UP	PF3D7_0424000	6.10895e-06	4.14953	1.17767	Plasmodium exported protein (PHISTc), unknown function
UP	PF3D7_1372200	6.12954e-06	6.8448	1.0812	histidine-rich protein III
UP	PF3D7_1420700	6.54003e-06	9.66169	1.02981	surface protein P113
UP	PF3D7_1207600	6.55378e-06	5.65726	1.08882	tRNA delta(2)-isopentenylpyrophosphate transferase, putative
UP	PF3D7_1032900	6.84909e-06	3.24678	1.3429	RNA polymerase II-associated protein 1, putative
UP	PF3D7_1009600	7.13343e-06	4.72525	1.13565	protein phosphatase PPM10, putative
UP	PF3D7_0922400	7.84738e-06	3.59939	1.26037	para-aminobenzoic acid synthetase
UP	PF3D7_0213600	7.85238e-06	3.2166	1.32382	conserved Plasmodium protein, unknown function
UP	PF3D7_1459100	8.37889e-06	3.45005	1.34704	GTP-binding protein, putative
UP	PF3D7_1408200	8.51877e-06	6.03218	1.07048	AP2 domain transcription factor AP2-G2, putative
UP	PF3D7_0816600	8.74562e-06	7.6535	1.03042	chaperone protein ClpB1
UP	PF3D7_1413800	8.87988e-06	2.92562	1.39716	diphthamide biosynthesis protein 1, putative
UP	PF3D7_0627500	9.08997e-06	9.0923	1.01792	protein DJ-1
UP	PF3D7_1237900	9.40034e-06	7.81033	1.0258	conserved Plasmodium protein, unknown function
UP	PF3D7_1342800	9.49098e-06	6.95134	1.03691	phosphoenolpyruvate carboxykinase
UP	PF3D7_0512200	1.11171e-05	4.24029	1.15346	glutathione synthetase
UP	PF3D7_1426100	1.11585e-05	7.36132	1.02058	transcription factor BTF3, putative
UP	PF3D7_0907600	1.14388e-05	4.92884	1.12312	translation initiation factor SUI1, putative
UP	PF3D7_1029300	1.14617e-05	5.40233	1.07455	conserved Plasmodium protein, unknown function
UP	PF3D7_1029200	1.16486e-05	2.83683	1.45675	WD repeat-containing protein, putative
UP	PF3D7_1352200	1.20755e-05	5.2012	1.09594	U3 small nucleolar RNA-associated protein 15, putative
UP	PF3D7_1466700	1.23581e-05	4.35443	1.14379	60S ribosome subunit biogenesis protein NIP7, putative
UP	PF3D7_1122800	1.24895e-05	5.33327	1.1157	calcium-dependent protein kinase 6
UP	PF3D7_1434700	1.24895e-05	5.04538	1.09349	mitochondrial import inner membrane translocase subunit TIM17, putative
UP	PF3D7_0623800	1.26705e-05	6.19947	1.04234	tyrosine kinase-like protein, putative
UP	PF3D7_1416700	1.28932e-05	2.32222	1.69878	conserved Plasmodium protein, unknown function
UP	PF3D7_1108900	1.29006e-05	2.74397	1.45713	conserved Plasmodium protein, unknown function
UP	PF3D7_0718600	1.29691e-05	4.93411	1.11767	conserved Plasmodium protein, unknown function
UP	PF3D7_0322400	1.33271e-05	5.6442	1.06067	regulator of initiation factor 2 (eIF2)
UP	PF3D7_1407900	1.37047e-05	7.0696	1.0172	plasmepsin I
UP	PF3D7_0913000	1.39802e-05	6.78789	1.02	conserved protein, unknown function
UP	PF3D7_1149600	1.41271e-05	3.43514	1.22387	DnaJ protein, putative
UP	PF3D7_1346700	1.41271e-05	2.59787	1.55893	6-cysteine protein
UP	PF3D7_1462400	1.51267e-05	5.61044	1.06397	conserved Plasmodium protein, unknown function
UP	PF3D7_1342700	1.54264e-05	4.2031	1.17287	DNA-directed RNA polymerases I, II, and III subunit RPABC4, putative
UP	PF3D7_1020700	1.5502e-05	4.96909	1.08485	N-acetyltransferase, GNAT family, putative
UP	PF3D7_1466200	1.57702e-05	6.47093	1.03364	conserved Plasmodium protein, unknown function
UP	PF3D7_0918800	1.60717e-05	5.46775	1.0616	dihydrouridine synthase, putative
UP	PF3D7_1470200	1.65453e-05	2.64226	1.47525	conserved Plasmodium protein, unknown function
UP	PF3D7_0306200	1.76513e-05	5.40668	1.04504	activator of Hsp90 ATPase
UP	PF3D7_1124700	1.77397e-05	5.46704	1.04642	GrpE protein homolog, mitochondrial, putative
UP	PF3D7_1244100	1.77603e-05	6.18302	1.02422	N-alpha-acetyltransferase 15, NatA auxiliary subunit, putative
UP	PF3D7_1240100	1.85891e-05	3.62714	1.48172	early transcribed membrane protein 12
UP	PF3D7_1311700	1.90181e-05	5.45505	1.03767	cytochrome c, putative
UP	PF3D7_1334300	2.00493e-05	5.95589	1.01886	MSP7-like protein
UP	PF3D7_1401400	2.01992e-05	5.20188	1.08811	early transcribed membrane protein 14.1
UP	PF3D7_1017400	2.09024e-05	5.67165	1.03632	phosphomannomutase, putative
UP	PF3D7_0520600	2.15332e-05	6.2251	1.01255	bis(5'-nucleosyl)-tetraphosphatase [asymmetrical]
UP	PF3D7_1342600	2.16812e-05	6.10697	1.04231	myosin A
UP	PF3D7_1338400	2.22909e-05	4.5591	1.13824	SprT-like domain-containing protein, putative
UP	PF3D7_1130600	2.36628e-05	5.28218	1.05189	methyltransferase, putative
UP	PF3D7_1468000	2.45102e-05	3.01314	1.26968	conserved Plasmodium protein, unknown function
UP	PF3D7_0516300	2.51805e-05	5.02781	1.05675	tRNA pseudouridine synthase, putative
UP	PF3D7_1009200	2.67526e-05	4.76593	1.05801	small subunit rRNA synthesis-associated protein, putative
UP	PF3D7_1022300	2.76712e-05	2.98182	1.29314	ZIP domain-containing protein, putative
UP	PF3D7_1122200	2.80179e-05	5.31843	1.07594	cupin-like protein, putative
UP	PF3D7_1429500	2.80663e-05	2.42243	1.52547	diphthamide biosynthesis protein 2, putative
UP	PF3D7_1028000	2.81421e-05	5.36835	1.03264	methyltransferase, putative
UP	PF3D7_1142700	3.07744e-05	4.9932	1.08119	methyltransferase, putative
UP	PF3D7_0113100	3.26809e-05	2.6023	1.56037	surface-associated interspersed protein 1.1 (SURFIN 1.1)
UP	PF3D7_0216900	3.32483e-05	4.59291	1.12458	conserved Plasmodium protein, unknown function
UP	PF3D7_1444100	3.41999e-05	6.20337	1.00239	conserved Plasmodium protein, unknown function
UP	PF3D7_1470700	3.497e-05	4.82767	1.04369	conserved Plasmodium protein, unknown function
UP	PF3D7_1035800	3.57395e-05	3.00898	1.40666	probable protein, unknown function
UP	PF3D7_1134200	3.57949e-05	5.08046	1.02886	conserved Plasmodium protein, unknown function
UP	PF3D7_0630900	3.60663e-05	4.98891	1.04065	ATP-dependent RNA helicase HAS1
UP	PF3D7_1235800	3.73308e-05	3.29759	1.25221	conserved Plasmodium protein, unknown function
UP	PF3D7_0605000	3.89816e-05	4.50736	1.07582	50S ribosomal protein L24, putative
UP	PF3D7_1102600	3.90955e-05	2.32287	1.69403	Plasmodium exported protein, unknown function
UP	PF3D7_1216700	4.13178e-05	3.48815	1.24062	perforin-like protein 2
UP	PF3D7_1105200	4.44484e-05	3.70772	1.19137	WD repeat-containing protein WRAP73, putative
UP	PF3D7_1447400	4.51822e-05	2.82139	1.28644	conserved Plasmodium protein, unknown function
UP	PF3D7_1441000	4.72899e-05	2.66595	1.34631	cytoplasmic tRNA 2-thiolation protein 2, putative
UP	PF3D7_0407200	5.07424e-05	4.83674	1.04633	peptidyl-tRNA hydrolase 2, putative
UP	PF3D7_0928600	5.16895e-05	3.60645	1.12678	conserved Plasmodium protein, unknown function
UP	PF3D7_0928900	5.25239e-05	3.5004	1.17351	guanylate kinase
UP	PF3D7_0113300	5.2584e-05	3.95393	1.11151	Plasmodium exported protein (hyp1), unknown function
UP	PF3D7_1131600	5.2584e-05	3.15199	1.19788	conserved Plasmodium protein, unknown function
UP	PF3D7_0708300	5.62436e-05	4.2501	1.0722	EKC/KEOPS complex subunit BUD32
UP	PF3D7_0407300	5.77139e-05	2.86315	1.27264	transcription factor, putative
UP	PF3D7_0919200	5.81565e-05	2.45728	2.04477	PPPDE peptidase, putative
UP	PF3D7_0730100	5.84647e-05	3.55997	1.15098	tRNA pseudouridine synthase D, putative
UP	PF3D7_1432400	5.9454e-05	4.36366	1.0487	leucine-rich repeat protein
UP	PF3D7_1309800	6.20172e-05	5.05723	1.00392	conserved Plasmodium protein, unknown function
UP	PF3D7_0812000	7.04705e-05	2.7309	1.30233	conserved Plasmodium protein, unknown function
UP	PF3D7_1018800	7.35273e-05	3.65503	1.14293	conserved protein, unknown function
UP	PF3D7_1352100	7.74028e-05	5.22362	1.0098	ABC transporter B family member 6, putative
UP	PF3D7_1315200	8.14549e-05	3.84386	1.14608	conserved Plasmodium protein, unknown function
UP	PF3D7_1227900	8.24797e-05	2.70888	1.31445	RNA pseudouridylate synthase, putative
UP	PF3D7_1016700	8.43539e-05	3.13769	1.22346	Plasmodium exported protein (PHISTc), unknown function
UP	PF3D7_1032300	8.7979e-05	3.71922	1.09551	conserved Plasmodium protein, unknown function
UP	PF3D7_1371700	8.80585e-05	4.03683	1.10784	serine/threonine protein kinase, FIKK family
UP	PF3D7_1200800	8.86877e-05	4.5064	1.04235	serine/threonine protein kinase, FIKK family
UP	PF3D7_1456200	9.45206e-05	3.0302	1.18392	conserved Plasmodium protein, unknown function
UP	PF3D7_1312000	9.89051e-05	3.48164	1.26826	malonyl CoA-acyl carrier protein transacylase
UP	PF3D7_0102200	0.000101543	4.78484	1.19315	ring-infected erythrocyte surface antigen
UP	PF3D7_1415700	0.000117831	4.20685	1.23028	serine palmitoyltransferase, putative
UP	PF3D7_0728700	0.000117831	2.8664	1.46811	alpha/beta hydrolase, putative
UP	PF3D7_1427800	0.000121483	4.4279	1.0342	exosome complex exonuclease RRP41, putative
UP	PF3D7_0912100	0.000121483	4.17698	1.04244	zinc finger protein, putative
UP	PF3D7_0622300	0.000128843	3.41181	1.13451	vacuolar transporter chaperone, putative
UP	PF3D7_1408900	0.000130254	4.1268	1.04129	tRNA-dihydrouridine synthase, putative
UP	PF3D7_1410500	0.000131174	4.49284	1.00296	conserved Plasmodium protein, unknown function
UP	PF3D7_0718000	0.000132022	3.04791	1.40275	dynein heavy chain, putative
UP	PF3D7_1201100	0.000144285	3.59422	1.14308	RESA-like protein with PHIST and DnaJ domains
UP	PF3D7_1461700	0.000146356	2.75471	1.63481	conserved Plasmodium protein, unknown function
UP	PF3D7_0418600	0.000148781	3.91665	1.26678	regulator of chromosome condensation, putative
UP	PF3D7_0524800	0.000148781	3.6878	1.21635	ubiquitin fusion degradation protein 1, putative
UP	PF3D7_1212200	0.000150509	2.61588	1.27633	conserved Plasmodium protein, unknown function
UP	PF3D7_0624900	0.000168083	3.45781	1.10571	GAS8-like protein, putative
UP	PF3D7_1334400	0.000183351	2.0955	1.54626	MSP7-like protein
UP	PF3D7_1429300	0.00018692	4.87906	1.00442	CPW-WPC family protein
UP	PF3D7_0705800	0.000187175	2.74658	1.2232	cysteine-rich secretory protein, putative
UP	PF3D7_1401500	0.000199327	2.99602	1.16975	esterase, putative
UP	PF3D7_1402100	0.000204439	3.82621	1.0205	conserved Plasmodium protein, unknown function
UP	PF3D7_1420100	0.000212279	3.38113	1.15215	conserved Plasmodium protein, unknown function
UP	PF3D7_0804700	0.000212745	4.02365	1.04058	conserved Plasmodium protein, unknown function
UP	PF3D7_1414900	0.000218313	2.85208	1.24897	ATP-dependent protease, putative
UP	PF3D7_1464200	0.000221623	3.21712	1.13507	zinc finger protein, putative
UP	PF3D7_0920000	0.000234273	3.63239	1.0823	long chain fatty acid elongation enzyme, putative
UP	PF3D7_1428400	0.000240002	4.05921	1.09823	WD and tetratricopeptide repeats protein 1, putative
UP	PF3D7_0315700	0.000250762	2.75313	1.34588	conserved Plasmodium membrane protein, unknown function
UP	PF3D7_1218900	0.000264371	3.43134	1.04499	WD repeat-containing protein, putative
UP	PF3D7_1119200	0.000274647	3.17679	1.1055	conserved protein, unknown function
UP	PF3D7_0509700	0.000313951	3.32563	1.07782	conserved Plasmodium protein, unknown function
UP	PF3D7_1455800	0.000316375	3.07003	1.13332	LCCL domain-containing protein
UP	PF3D7_0907300	0.00032281	4.2658	1.01201	conserved Plasmodium protein, unknown function
UP	PF3D7_1322900	0.000362229	3.23566	1.07289	conserved Plasmodium protein, unknown function
UP	PF3D7_0702200	0.000432784	2.89201	1.23241	lysophospholipase, putative
UP	PF3D7_1463400	0.000432841	3.3501	1.04514	DNA-directed RNA polymerase III subunit RPC4, putative
UP	PF3D7_0822100	0.000511133	3.39538	1.04292	mediator of RNA polymerase II transcription subunit 7, putative
UP	PF3D7_1214200	0.000517657	2.70627	1.16389	histone-lysine N-methyltransferase, putative
UP	PF3D7_0102600	0.000632268	3.44558	1.02174	serine/threonine protein kinase, FIKK family
UP	PF3D7_1311000	0.000686423	3.37521	1.01631	protein ISD11
UP	PF3D7_1401100	0.000732679	3.56472	1.07431	DnaJ protein, putative
UP	PF3D7_1211100	0.000735559	3.73808	1.02073	HSP20-like chaperone
UP	PF3D7_0530400	0.000907189	2.84713	1.08237	conserved Plasmodium protein, unknown function
UP	PF3D7_0727600	0.000973635	3.26809	1.04222	conserved Plasmodium protein, unknown function
UP	PF3D7_0318400	0.00108517	2.21026	1.38897	conserved Plasmodium protein, unknown function
UP	PF3D7_0611500	0.00113321	2.03408	1.52206	conserved Plasmodium protein, unknown function
UP	PF3D7_1454200	0.00123217	2.82765	1.03183	conserved Plasmodium protein, unknown function
UP	PF3D7_1135800	0.00123523	2.951	1.07546	conserved Plasmodium protein, unknown function
UP	PF3D7_0517100	0.00132083	2.94544	1.04061	conserved Plasmodium protein, unknown function
UP	PF3D7_0932700	0.00132257	3.11005	1.02005	conserved Plasmodium protein, unknown function
UP	PF3D7_1007800	0.00154616	2.11453	1.26615	conserved Plasmodium protein, unknown function
UP	PF3D7_1037800	0.00162298	1.75279	1.56389	dynein intermediate chain, putative
UP	PF3D7_1200700	0.00167539	2.85168	1.037	acyl-CoA synthetase
UP	PF3D7_0109600	0.00175766	3.18425	1.00023	cold-shock protein, putative
UP	PF3D7_1476600	0.00223839	4.4769	1.33614	Plasmodium exported protein, unknown function
UP	PF3D7_0311700	0.00282561	2.78386	1.04032	plasmepsin VI
UP	PF3D7_1339500	0.00282561	2.57978	1.04032	mitochondrial ribosomal protein L49 precursor, putative
UP	PF3D7_1458800	0.00301846	2.35057	1.09719	DNA-directed RNA polymerase III subunit RPC5, putative
UP	PF3D7_0531200	0.00330486	2.34692	1.1157	ribosomal protein S16, mitochondrial, putative
UP	PF3D7_1206900	0.00376301	2.68672	1.00083	conserved Plasmodium protein, unknown function
UP	PF3D7_1476500	0.0040057	4.95955	1.07318	probable protein, unknown function
UP	PF3D7_0500600	0.00451966	3.89993	1.32568	stevor, pseudogene
UP	PF3D7_1110800	0.00484733	2.34102	1.18926	conserved Plasmodium protein, unknown function
UP	PF3D7_0925000	0.00520816	2.3549	1.01413	conserved Plasmodium protein, unknown function
UP	PF3D7_1473400	0.00592127	3.19959	1.05716	conserved Plasmodium protein, unknown function
UP	PF3D7_0936000	0.00850729	2.4434	1.09648	ring-exported protein 2
UP	PF3D7_0625400	0.00953454	2.33846	1.04273	conserved Plasmodium protein, unknown function
DOWN	PF3D7_0733000	8.32911e-37	5.16966	-3.30496	erythrocyte membrane protein 1, PfEMP1
DOWN	PF3D7_0426000	3.05114e-35	4.30264	-3.79326	erythrocyte membrane protein 1, PfEMP1
DOWN	PF3D7_1300100	1.34371e-15	6.07747	-1.91133	erythrocyte membrane protein 1, PfEMP1
DOWN	PF3D7_1035700	2.12828e-13	9.51739	-1.69472	duffy binding-like merozoite surface protein
DOWN	PF3D7_0508000	2.12828e-13	9.54983	-1.69974	6-cysteine protein
DOWN	PF3D7_0308100	3.98112e-13	8.0683	-1.70448	zinc finger protein, putative
DOWN	PF3D7_1335100	1.54537e-12	10.4329	-1.62599	merozoite surface protein 7
DOWN	PF3D7_0221200	1.54537e-12	3.98917	-1.91515	Plasmodium exported protein (hyp15), unknown function
DOWN	PF3D7_0607700	1.54537e-12	8.30204	-1.65257	conserved Plasmodium protein, unknown function
DOWN	PF3D7_1133300	4.88353e-12	6.64081	-1.71205	LEM3/CDC50 family protein, putative
DOWN	PF3D7_0935800	5.03877e-12	11.4486	-1.58381	cytoadherence linked asexual protein 9
DOWN	PF3D7_0704100	6.63831e-12	8.07197	-1.60299	conserved Plasmodium membrane protein, unknown function
DOWN	PF3D7_1315300	7.16162e-12	5.95285	-1.73168	conserved Plasmodium protein, unknown function
DOWN	PF3D7_1121300	7.39022e-12	7.58064	-1.60812	tyrosine kinase-like protein
DOWN	PF3D7_0612700	9.33629e-12	8.09742	-1.6073	6-cysteine protein
DOWN	PF3D7_0302500	9.73985e-12	11.6151	-1.55919	cytoadherence linked asexual protein 3.1
DOWN	PF3D7_1306000	1.06757e-11	4.30205	-2.04211	conserved Plasmodium protein, unknown function
DOWN	PF3D7_0507200	2.10128e-11	6.6721	-1.65682	subtilisin-like protease 3
DOWN	PF3D7_0531100	2.10128e-11	6.96383	-1.62518	conserved Plasmodium protein, unknown function
DOWN	PF3D7_0705100	3.61318e-11	5.21036	-1.72672	conserved Plasmodium protein, unknown function
DOWN	PF3D7_1138000	4.21191e-11	6.96568	-1.5882	conserved Plasmodium protein, unknown function
DOWN	PF3D7_0808700	4.52857e-11	4.968	-1.62361	erythrocyte membrane protein 1, PfEMP1
DOWN	PF3D7_0604100	4.52857e-11	9.79478	-1.51533	AP2 domain transcription factor
DOWN	PF3D7_0704500	5.05472e-11	8.74009	-1.52101	serine/threonine protein kinase, putative
DOWN	PF3D7_0207700	6.73339e-11	10.9503	-1.49468	serine repeat antigen 4
DOWN	PF3D7_1410400	1.00633e-10	11.0112	-1.48286	rhoptry-associated protein 1
DOWN	PF3D7_1334600	1.00633e-10	6.98153	-1.55065	MSP7-like protein
DOWN	PF3D7_0508100	1.04419e-10	10.7531	-1.48007	SET domain protein, putative
DOWN	PF3D7_1138400	1.26156e-10	8.51511	-1.49366	guanylyl cyclase
DOWN	PF3D7_0207800	1.50194e-10	10.0898	-1.46639	serine repeat antigen 3
DOWN	PF3D7_0419400	1.50194e-10	8.7415	-1.4817	conserved Plasmodium protein, unknown function
DOWN	PF3D7_0707300	1.56614e-10	11.8223	-1.4611	rhoptry-associated membrane antigen
DOWN	PF3D7_0934800	1.66309e-10	9.12502	-1.47296	cAMP-dependent protein kinase catalytic subunit
DOWN	PF3D7_1334800	1.66309e-10	8.06372	-1.48625	MSP7-like protein
DOWN	PF3D7_1322600	1.81318e-10	5.43813	-1.72676	conserved Plasmodium protein, unknown function
DOWN	PF3D7_1327500	1.81318e-10	3.06098	-2.41746	conserved Plasmodium protein, unknown function
DOWN	PF3D7_0204100	2.22033e-10	9.40266	-1.45638	conserved Plasmodium protein, unknown function
DOWN	PF3D7_0200100	2.38602e-10	3.77615	-1.99384	erythrocyte membrane protein 1, PfEMP1
DOWN	PF3D7_0800300	2.43882e-10	3.71374	-1.79486	erythrocyte membrane protein 1, PfEMP1
DOWN	PF3D7_0611600	2.62471e-10	7.54335	-1.48947	basal complex transmembrane protein 1
DOWN	PF3D7_1235200	2.64232e-10	8.72628	-1.46939	V-type K+-independent H+-translocating inorganic pyrophosphatase
DOWN	PF3D7_1228600	3.35679e-10	13.5408	-1.42934	merozoite surface protein 9
DOWN	PF3D7_1441300	3.3574e-10	5.71468	-1.60321	serine/threonine protein kinase, putative
DOWN	PF3D7_1010400	3.44962e-10	3.91691	-2.04554	conserved Plasmodium protein, unknown function
DOWN	PF3D7_0508900	3.64604e-10	10.1042	-1.43007	conserved Plasmodium protein, unknown function
DOWN	PF3D7_1361800	3.738e-10	11.0231	-1.42853	glideosome-associated connector
DOWN	PF3D7_0501600	3.78607e-10	9.33677	-1.44155	rhoptry-associated protein 2
DOWN	PF3D7_0905500	4.4193e-10	4.12398	-1.82236	conserved Plasmodium protein, unknown function
DOWN	PF3D7_0905400	4.56773e-10	13.0493	-1.4175	high molecular weight rhoptry protein 3
DOWN	PF3D7_0929400	5.08e-10	12.3202	-1.41392	high molecular weight rhoptry protein 2
DOWN	PF3D7_1252100	5.41727e-10	9.89258	-1.42042	rhoptry neck protein 3
DOWN	PF3D7_0220800	8.00749e-10	9.4881	-1.41091	cytoadherence linked asexual protein 2
DOWN	PF3D7_1033900	9.19475e-10	8.14422	-1.42199	ubiquitin-conjugating enzyme E2, putative
DOWN	PF3D7_0207600	1.44469e-09	13.8268	-1.37513	serine repeat antigen 5
DOWN	PF3D7_1122700	1.83547e-09	5.67588	-1.49521	conserved Plasmodium protein, unknown function
DOWN	PF3D7_0806200	1.93314e-09	6.09865	-1.49979	Dpy-19-like C-mannosyltransferase, putative
DOWN	PF3D7_0518200	2.10055e-09	7.12085	-1.40083	SWIB/MDM2 domain-containing protein
DOWN	PF3D7_0404700	2.36813e-09	8.23549	-1.3915	dipeptidyl aminopeptidase 3
DOWN	PF3D7_1018200	2.39679e-09	9.59625	-1.3705	serine/threonine protein phosphatase 8, putative
DOWN	PF3D7_1114900	2.63957e-09	6.41603	-1.47053	conserved Plasmodium protein, unknown function
DOWN	PF3D7_1140400	2.68839e-09	9.40397	-1.37261	conserved Plasmodium protein, unknown function
DOWN	PF3D7_0914400	2.80076e-09	7.68774	-1.40926	conserved Plasmodium protein, unknown function
DOWN	PF3D7_1025900	4.04739e-09	9.77688	-1.35107	conserved Plasmodium protein, unknown function
DOWN	PF3D7_1440400	4.3615e-09	6.93584	-1.42276	zinc finger protein, putative
DOWN	PF3D7_0930300	4.63367e-09	13.143	-1.3333	merozoite surface protein 1
DOWN	PF3D7_1116000	4.7018e-09	9.87601	-1.34539	rhoptry neck protein 4
DOWN	PF3D7_0506900	5.42935e-09	9.96026	-1.3363	rhomboid protease ROM4
DOWN	PF3D7_0207400	5.42935e-09	9.92296	-1.33023	serine repeat antigen 7
DOWN	PF3D7_1019100	5.53071e-09	8.07817	-1.35903	conserved Plasmodium protein, unknown function
DOWN	PF3D7_1307900	8.10283e-09	4.28148	-1.69256	tripartite motif protein, putative
DOWN	PF3D7_1143200	8.41856e-09	8.1649	-1.32664	DnaJ protein, putative
DOWN	PF3D7_1321100	1.19106e-08	7.92072	-1.34411	conserved Plasmodium protein, unknown function
DOWN	PF3D7_1224100	1.21926e-08	8.31815	-1.31992	conserved Plasmodium protein, unknown function
DOWN	PF3D7_0831600	1.23502e-08	8.62442	-1.30973	cytoadherence linked asexual protein 8
DOWN	PF3D7_1141800	1.27342e-08	6.77394	-1.39012	EELM2 domain-containing protein, putative
DOWN	PF3D7_1035100	1.27682e-08	8.33375	-1.33811	probable protein, unknown function
DOWN	PF3D7_1133400	1.46469e-08	7.34135	-1.33767	apical membrane antigen 1
DOWN	PF3D7_0613800	1.8255e-08	10.9139	-1.28241	AP2 domain transcription factor, putative
DOWN	PF3D7_0501500	2.52948e-08	7.93038	-1.32037	rhoptry-associated protein 3
DOWN	PF3D7_0828900	2.94362e-08	7.51118	-1.31936	conserved Plasmodium protein, unknown function
DOWN	PF3D7_1359700	2.98919e-08	4.77882	-1.55691	conserved Plasmodium protein, unknown function
DOWN	PF3D7_0407800	3.43071e-08	9.29219	-1.26924	conserved Plasmodium protein, unknown function
DOWN	PF3D7_1364100	3.72061e-08	8.56492	-1.26411	6-cysteine protein
DOWN	PF3D7_1313600	4.6516e-08	5.33406	-1.47438	conserved Plasmodium protein, unknown function
DOWN	PF3D7_1227000	4.67593e-08	3.88548	-1.64975	conserved Plasmodium protein, unknown function
DOWN	PF3D7_0511200	5.12145e-08	8.00143	-1.26256	stearoyl-CoA desaturase
DOWN	PF3D7_0803200	6.5625e-08	8.70971	-1.24851	filament assembling protein, putative
DOWN	PF3D7_1463900	6.62042e-08	8.62134	-1.25779	EF-hand calcium-binding domain-containing protein, putative
DOWN	PF3D7_0805700	6.87452e-08	9.1258	-1.24067	serine/threonine protein kinase, FIKK family
DOWN	PF3D7_1252600	7.06633e-08	5.99837	-1.32446	esterase, putative
DOWN	PF3D7_1147000	7.36056e-08	5.05816	-1.47289	sporozoite and liver stage asparagine-rich protein
DOWN	PF3D7_0530900	7.90649e-08	7.41776	-1.27927	formin 1
DOWN	PF3D7_0517900	8.62686e-08	8.28311	-1.24698	zinc finger protein, putative
DOWN	PF3D7_0619700	1.07792e-07	6.75188	-1.27032	conserved Plasmodium protein, unknown function
DOWN	PF3D7_0811600	1.08028e-07	7.78114	-1.23903	conserved Plasmodium protein, unknown function
DOWN	PF3D7_0303400	1.1717e-07	6.78272	-1.26314	palmitoyltransferase DHHC1
DOWN	PF3D7_1136200	1.23413e-07	8.51825	-1.23597	conserved Plasmodium protein, unknown function
DOWN	PF3D7_0420600	1.41902e-07	6.23238	-1.27205	conserved Plasmodium protein, unknown function
DOWN	PF3D7_1232500	1.49191e-07	7.62156	-1.2305	CG2-related protein, putative
DOWN	PF3D7_1248000	1.52759e-07	2.26046	-2.12962	tRNA-splicing endonuclease, putative
DOWN	PF3D7_1449200	1.52759e-07	10.1028	-1.20481	conserved Plasmodium protein, unknown function
DOWN	PF3D7_1229300	1.57553e-07	7.00109	-1.25202	conserved Plasmodium protein, unknown function
DOWN	PF3D7_0104100	1.57553e-07	6.58674	-1.30653	conserved Plasmodium membrane protein, unknown function
DOWN	PF3D7_0522600	1.68967e-07	7.62659	-1.32098	inner membrane complex protein
DOWN	PF3D7_0209600	1.83208e-07	7.92755	-1.21526	transporter, putative
DOWN	PF3D7_1121900	1.84619e-07	6.3984	-1.26168	serine/threonine protein kinase, putative
DOWN	PF3D7_1029900	1.93342e-07	10.9309	-1.18784	conserved Plasmodium protein, unknown function
DOWN	PF3D7_1238000	2.00625e-07	4.97419	-1.46784	COPI associated protein, putative
DOWN	PF3D7_0817700	2.19845e-07	9.80181	-1.1913	rhoptry neck protein 5
DOWN	PF3D7_1145200	2.26026e-07	9.96509	-1.19098	serine/threonine protein kinase, putative
DOWN	PF3D7_1227300	2.28995e-07	4.49607	-1.49547	conserved Plasmodium protein, unknown function
DOWN	PF3D7_0515700	2.29471e-07	11.6188	-1.17945	glideosome-associated protein 40, putative
DOWN	PF3D7_0207500	2.67462e-07	11.0508	-1.17273	serine repeat antigen 6
DOWN	PF3D7_0402000	2.85748e-07	8.24395	-1.17998	Plasmodium exported protein (PHISTa), unknown function
DOWN	PF3D7_0216800	2.9671e-07	6.31229	-1.27154	TMEM121 domain-containing protein, putative
DOWN	PF3D7_0722200	3.31195e-07	9.86539	-1.17215	rhoptry-associated leucine zipper-like protein 1
DOWN	PF3D7_1027300	3.90206e-07	13.1018	-1.1542	peroxiredoxin
DOWN	PF3D7_1452000	3.91675e-07	9.52236	-1.17052	rhoptry neck protein 2
DOWN	PF3D7_0924500	3.98344e-07	7.274	-1.2007	conserved Plasmodium membrane protein, unknown function
DOWN	PF3D7_0924600	3.99759e-07	7.43967	-1.20012	conserved Plasmodium protein, unknown function
DOWN	PF3D7_0207000	4.15089e-07	10.3706	-1.1551	merozoite surface protein 4
DOWN	PF3D7_0919900	4.42396e-07	10.4991	-1.15226	regulator of chromosome condensation, putative
DOWN	PF3D7_1432200	4.48785e-07	6.77563	-1.24287	conserved Plasmodium protein, unknown function
DOWN	PF3D7_0916300	5.57236e-07	5.74866	-1.29546	conserved Plasmodium protein, unknown function
DOWN	PF3D7_1110700	5.60672e-07	7.97897	-1.16669	actin-like protein, putative
DOWN	PF3D7_1208400	6.16219e-07	6.30291	-1.20536	amino acid transporter, putative
DOWN	PF3D7_0917300	6.23801e-07	5.7655	-1.35125	conserved Plasmodium membrane protein, unknown function
DOWN	PF3D7_1128900	6.38279e-07	9.01552	-1.15063	conserved Plasmodium protein, unknown function
DOWN	PF3D7_1010300	7.09314e-07	7.99141	-1.15085	succinate dehydrogenase subunit 4, putative
DOWN	PF3D7_0806300	7.49519e-07	8.68191	-1.14282	ferlin, putative
DOWN	PF3D7_0816200	7.98096e-07	7.35084	-1.15677	vacuolar protein sorting-associated protein 2, putative
DOWN	PF3D7_1439000	1.11694e-06	8.53077	-1.12182	copper transporter
DOWN	PF3D7_0802100	1.12807e-06	9.60882	-1.11591	AP2 domain transcription factor, putative
DOWN	PF3D7_1322500	1.24649e-06	8.05457	-1.12687	palmitoyltransferase DHHC5
DOWN	PF3D7_1457900	1.34119e-06	7.77061	-1.12364	conserved Plasmodium protein, unknown function
DOWN	PF3D7_0802800	1.34372e-06	8.36791	-1.12333	serine/threonine protein phosphatase 2B catalytic subunit A
DOWN	PF3D7_1019300	1.37086e-06	7.65964	-1.13301	zinc finger protein, putative
DOWN	PF3D7_1014900	1.43068e-06	8.61014	-1.11824	conserved Plasmodium protein, unknown function
DOWN	PF3D7_0612200	1.52218e-06	8.96442	-1.10527	leucine-rich repeat protein
DOWN	PF3D7_1107100	1.57138e-06	8.03303	-1.11689	nucleic acid binding protein, putative
DOWN	PF3D7_0423500	1.62857e-06	9.759	-1.10022	glideosome associated protein with multiple membrane spans 2
DOWN	PF3D7_1129300	1.72085e-06	6.44322	-1.19716	conserved Plasmodium protein, unknown function
DOWN	PF3D7_1325400	1.73601e-06	8.79401	-1.10066	conserved Plasmodium protein, unknown function
DOWN	PF3D7_1312100	1.73717e-06	5.97294	-1.15999	GYF domain-containing protein, putative
DOWN	PF3D7_1436200	1.93579e-06	6.61341	-1.18686	conserved Plasmodium protein, unknown function
DOWN	PF3D7_1449600	2.07349e-06	4.22215	-1.49272	conserved Plasmodium protein, unknown function
DOWN	PF3D7_1035400	2.10219e-06	8.77738	-1.08932	merozoite surface protein 3
DOWN	PF3D7_1137200	2.22302e-06	4.77784	-1.30708	apical exonemal protein
DOWN	PF3D7_0814400	2.4368e-06	5.46172	-1.21139	phospholipase DDHD1, putative
DOWN	PF3D7_0916900	2.49136e-06	3.89942	-1.2879	zinc finger protein, putative
DOWN	PF3D7_0528400	2.56453e-06	7.84398	-1.12583	palmitoyltransferase DHHC7
DOWN	PF3D7_0723300	2.76879e-06	7.97318	-1.09425	conserved Plasmodium protein, unknown function
DOWN	PF3D7_0404900	2.77606e-06	8.81519	-1.08234	6-cysteine protein
DOWN	PF3D7_1303700	3.19518e-06	5.25814	-1.19869	conserved Plasmodium protein, unknown function
DOWN	PF3D7_0206800	3.57671e-06	10.2445	-1.05621	merozoite surface protein 2
DOWN	PF3D7_0314800	3.71215e-06	3.82374	-1.59563	conserved Plasmodium protein, unknown function
DOWN	PF3D7_0607600	3.93115e-06	8.52948	-1.06707	spindle assembly abnormal protein 6, putative
DOWN	PF3D7_1339700	4.17468e-06	8.78839	-1.05886	conserved Plasmodium protein, unknown function
DOWN	PF3D7_0422800	4.18023e-06	5.39518	-1.16601	serpentine receptor, putative
DOWN	PF3D7_1035900	4.2438e-06	7.7775	-1.08693	probable protein, unknown function
DOWN	PF3D7_1223100	4.37291e-06	10.4974	-1.05002	cAMP-dependent protein kinase regulatory subunit
DOWN	PF3D7_0103000	4.38858e-06	5.64913	-1.18629	vacuolar protein sorting-associated protein VTA1, putative
DOWN	PF3D7_1323700	4.61301e-06	9.84801	-1.05257	glideosome associated protein with multiple membrane spans 1
DOWN	PF3D7_1459400	4.64739e-06	7.46082	-1.07105	conserved Plasmodium protein, unknown function
DOWN	PF3D7_1432900	4.66044e-06	5.93045	-1.16396	SF-assemblin, putative
DOWN	PF3D7_0603800	4.93954e-06	8.71252	-1.05492	centrosomal protein CEP76, putative
DOWN	PF3D7_0208000	5.14563e-06	9.05538	-1.05008	serine repeat antigen 1
DOWN	PF3D7_1330400.1	5.82221e-06	3.23814	-1.40945
DOWN	PF3D7_0813100	6.05157e-06	7.55112	-1.1165	conserved Plasmodium protein, unknown function
DOWN	PF3D7_1113000	6.20079e-06	6.1979	-1.11783	conserved Plasmodium protein, unknown function
DOWN	PF3D7_1035600	6.71776e-06	6.75281	-1.09875	merozoite surface protein
DOWN	PF3D7_1238600	7.15294e-06	8.07	-1.04783	sphingomyelin phosphodiesterase
DOWN	PF3D7_0811700	8.02072e-06	2.81722	-1.89848	conserved Plasmodium protein, unknown function
DOWN	PF3D7_0614100	8.04169e-06	5.41622	-1.16892	conserved Plasmodium protein, unknown function
DOWN	PF3D7_1459300	8.39815e-06	2.27227	-1.7379	OPA3-like protein, putative
DOWN	PF3D7_0923500	8.87364e-06	6.63375	-1.07043	cyclin-dependent kinases regulatory subunit, putative
DOWN	PF3D7_1423500	9.55482e-06	5.35336	-1.13965	conserved Plasmodium protein, unknown function
DOWN	PF3D7_1343100	1.05396e-05	7.63871	-1.03603	conserved Plasmodium protein, unknown function
DOWN	PF3D7_1034700	1.08256e-05	6.7851	-1.05731	ADP-ribosylation factor, putative
DOWN	PF3D7_1220300	1.12679e-05	7.04952	-1.0408	cell cycle associated protein, putative
DOWN	PF3D7_1134300	1.17549e-05	7.97285	-1.02102	conserved Plasmodium protein, unknown function
DOWN	PF3D7_0423300	1.17549e-05	7.13977	-1.06871	conserved Plasmodium protein, unknown function
DOWN	PF3D7_0413500	1.22995e-05	8.53631	-1.00967	phosphoglucomutase-2
DOWN	PF3D7_0715300	1.27682e-05	6.61647	-1.04469	calcium/calmodulin-dependent protein kinase, putative
DOWN	PF3D7_0409000	1.33271e-05	3.51737	-1.39811	conserved Plasmodium protein, unknown function
DOWN	PF3D7_0403800	1.33464e-05	6.01824	-1.08107	alpha/beta hydrolase, putative
DOWN	PF3D7_0628100	1.43132e-05	9.49415	-1.00833	HECT-domain (ubiquitin-transferase), putative
DOWN	PF3D7_0416500	1.49633e-05	5.88463	-1.07857	repressor of RNA polymerase III transcription MAF1
DOWN	PF3D7_1368000	1.54264e-05	4.63078	-1.16708	conserved Plasmodium protein, unknown function
DOWN	PF3D7_0321100	1.54264e-05	7.28902	-1.02718	conserved Plasmodium protein, unknown function
DOWN	PF3D7_0419700	1.81459e-05	5.19597	-1.21565	apical merozoite protein
DOWN	PF3D7_1131100	2.14612e-05	6.75148	-1.03569	serpentine receptor, putative
DOWN	PF3D7_1030800	2.15025e-05	5.12272	-1.19495	calmodulin, putative
DOWN	PF3D7_0530300	2.26463e-05	6.93383	-1.0212	conserved Plasmodium membrane protein, unknown function
DOWN	PF3D7_1453200	2.30138e-05	6.22578	-1.0382	conserved Plasmodium protein, unknown function
DOWN	PF3D7_1432300	2.43528e-05	3.46899	-1.32367	conserved Plasmodium protein, unknown function
DOWN	PF3D7_0611000	2.44963e-05	4.71035	-1.11006	SNARE associated Golgi protein, putative
DOWN	PF3D7_1003000	2.49439e-05	5.62316	-1.10022	conserved Plasmodium protein, unknown function
DOWN	PF3D7_0423400	2.66937e-05	6.95353	-1.05929	apical asparagine-rich protein AARP
DOWN	PF3D7_0106200	2.68556e-05	4.31331	-1.23383	conserved Plasmodium protein, unknown function
DOWN	PF3D7_1145600	2.87275e-05	5.79973	-1.0589	conserved protein, unknown function
DOWN	PF3D7_1334900	3.21968e-05	2.98718	-1.76292	MSP7-like protein, fragment, pseudogene
DOWN	PF3D7_0805200	3.41999e-05	3.73548	-1.46476	gamete release protein, putative
DOWN	PF3D7_1145300	3.41999e-05	5.78611	-1.04446	cysteine-rich PDZ-binding protein, putative
DOWN	PF3D7_1129700	3.66842e-05	3.95942	-1.14165	conserved Plasmodium protein, unknown function
DOWN	PF3D7_1205200	3.81323e-05	2.98991	-1.64143	HAD domain ookinete protein, putative
DOWN	PF3D7_1358400	3.88996e-05	3.76451	-1.25221	conserved Plasmodium protein, unknown function
DOWN	PF3D7_0828700	4.82093e-05	3.26138	-1.39622	conserved Plasmodium protein, unknown function
DOWN	PF3D7_1233700	7.37823e-05	4.96114	-1.09668	homocysteine S-methyltransferase, putative
DOWN	PF3D7_0819700	7.61758e-05	4.89936	-1.05387	conserved Plasmodium protein, unknown function
DOWN	PF3D7_1205300	7.64144e-05	4.58294	-1.04755	conserved Plasmodium protein, unknown function
DOWN	PF3D7_1344500	9.59669e-05	5.11304	-1.01028	U6 snRNA phosphodiesterase, putative
DOWN	PF3D7_1026500	0.000102519	4.56835	-1.16857	conserved Plasmodium protein, unknown function
DOWN	PF3D7_1016600	0.000132476	4.91195	-1.0176	Plasmodium exported protein (PHISTc), unknown function
DOWN	PF3D7_1458200	0.000135678	3.57577	-1.10925	conserved Plasmodium protein, unknown function
DOWN	PF3D7_0627200	0.000139548	4.87347	-1.0263	myosin light chain, putative
DOWN	PF3D7_1140600	0.000159553	4.96448	-1.08448	conserved Plasmodium protein, unknown function
DOWN	PF3D7_1034200	0.000192453	4.91355	-1.0077	ribosomal protein L27, putative
DOWN	PF3D7_0316300.2	0.000213499	2.95401	-1.2923
DOWN	PF3D7_1004500	0.000227645	4.49787	-1.0422	conserved Plasmodium protein, unknown function
DOWN	PF3D7_1437100	0.000254437	4.06214	-1.04499	conserved Plasmodium protein, unknown function
DOWN	PF3D7_0218100	0.000259898	3.95314	-1.07816	conserved Plasmodium membrane protein, unknown function
DOWN	PF3D7_0725400	0.000265099	4.63671	-1.05386	conserved Plasmodium protein, unknown function
DOWN	PF3D7_0404400	0.000282516	4.71391	-1.02744	6-cysteine protein
DOWN	PF3D7_1419500	0.000290173	3.74531	-1.15451	conserved Plasmodium protein, unknown function
DOWN	PF3D7_1142900	0.000461973	2.86192	-1.33964	conserved Plasmodium protein, unknown function
DOWN	PF3D7_1011300	0.000493448	2.25818	-1.30987	protein ARV1, putative
DOWN	PF3D7_0421300	0.000558645	5.08715	-1.05682	erythrocyte membrane protein 1, PfEMP1
DOWN	PF3D7_0808600	0.000561414	3.47089	-1.26676	erythrocyte membrane protein 1, PfEMP1
DOWN	PF3D7_0826200	0.000903408	2.86086	-1.09966	alpha/beta hydrolase, putative
DOWN	PF3D7_0505300	0.000907761	2.89376	-1.13444	UDP-N-acetylglucosamine transporter, putative
DOWN	PF3D7_1116900	0.00116154	4.59568	-1.19685	conserved Plasmodium protein, unknown function
DOWN	PF3D7_1331400	0.00120028	3.63241	-1.19346	CPW-WPC family protein
DOWN	PF3D7_1453100	0.00124326	3.38481	-1.05677	dynactin subunit 4, putative
DOWN	PF3D7_0809700	0.00136103	3.44818	-1.00607	RuvB-like helicase 1
DOWN	PF3D7_1037900	0.00139527	2.82031	-1.09573	conserved Plasmodium protein, unknown function
DOWN	PF3D7_1335600	0.00159129	2.57358	-1.08314	conserved Plasmodium protein, unknown function
DOWN	PF3D7_0712400	0.00167539	4.31303	-1.22876	erythrocyte membrane protein 1, PfEMP1
DOWN	PF3D7_0514800	0.00207291	3.40446	-1.01119	inositol polyphosphate multikinase, putative
DOWN	PF3D7_0929600	0.00342729	4.79431	-1.10075	G2 protein, putative
DOWN	PF3D7_1023000	0.00361328	3.10684	-1.00357	conserved Plasmodium membrane protein, unknown function
DOWN	PF3D7_1440900	0.00407904	3.34913	-1.18531	conserved Plasmodium protein, unknown function
DOWN	PF3D7_1147200	0.00532756	1.87932	-1.38707	tubulin--tyrosine ligase, putative
DOWN	PF3D7_0917800	0.00668295	2.51344	-1.07027	conserved Plasmodium protein, unknown function
DOWN	PF3D7_0413400	0.00675879	3.52067	-1.06841	erythrocyte membrane protein 1 (PfEMP1), exon 1, pseudogene
DOWN	PF3D7_0929500	0.00909173	2.4349	-1.4815	conserved protein, unknown function
Genes up or down in 3D7_KO relative to 3D7_WT with FDR <= 0.01 and fold change > 2
